# Supplementary material for: High-aspect-ratio single-crystalline porous In2O3 nanobelts with enhanced gas sensing properties
Source: Royal Society of Chemistry journal article supplement (doi:10.1039/c1jm11356a), 2011-01-01
Supplement: c1jm11356a.pdf [file c1jm11356a.pdf]

## Supporting Information

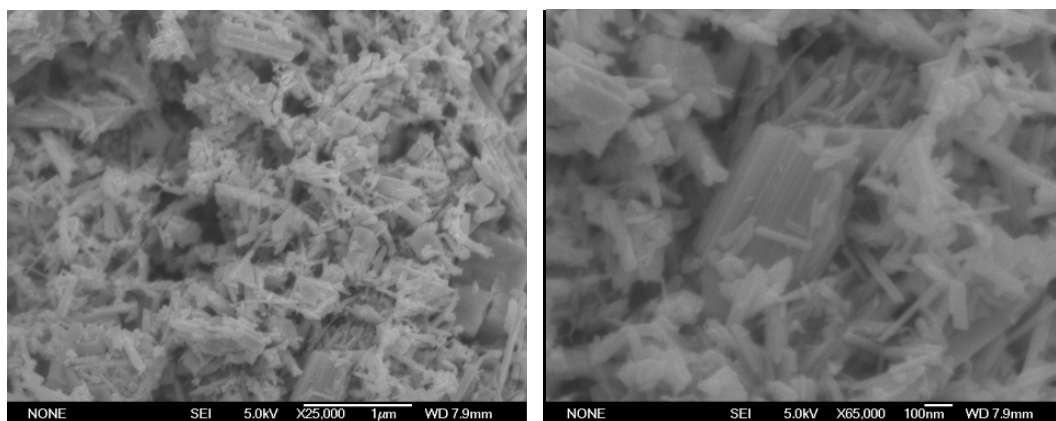

**Figure S1.** SEM images of the product after reacting for 12 h in the hydrothermal process, revealing the formation of short InOOH nanorods.

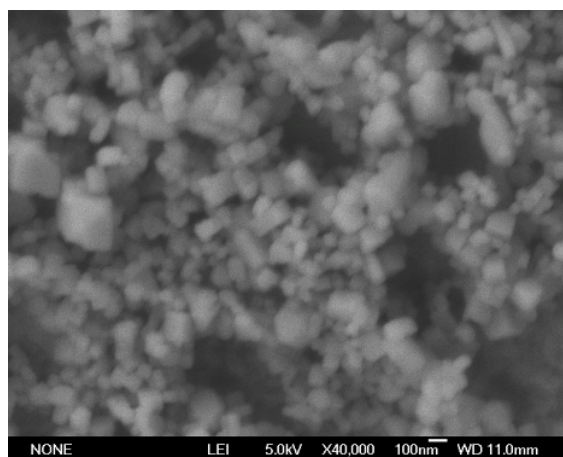

**Figure S2.** SEM image of the product when the amount of distilled water was increased, showing the formation of InOOH nanoparticles.

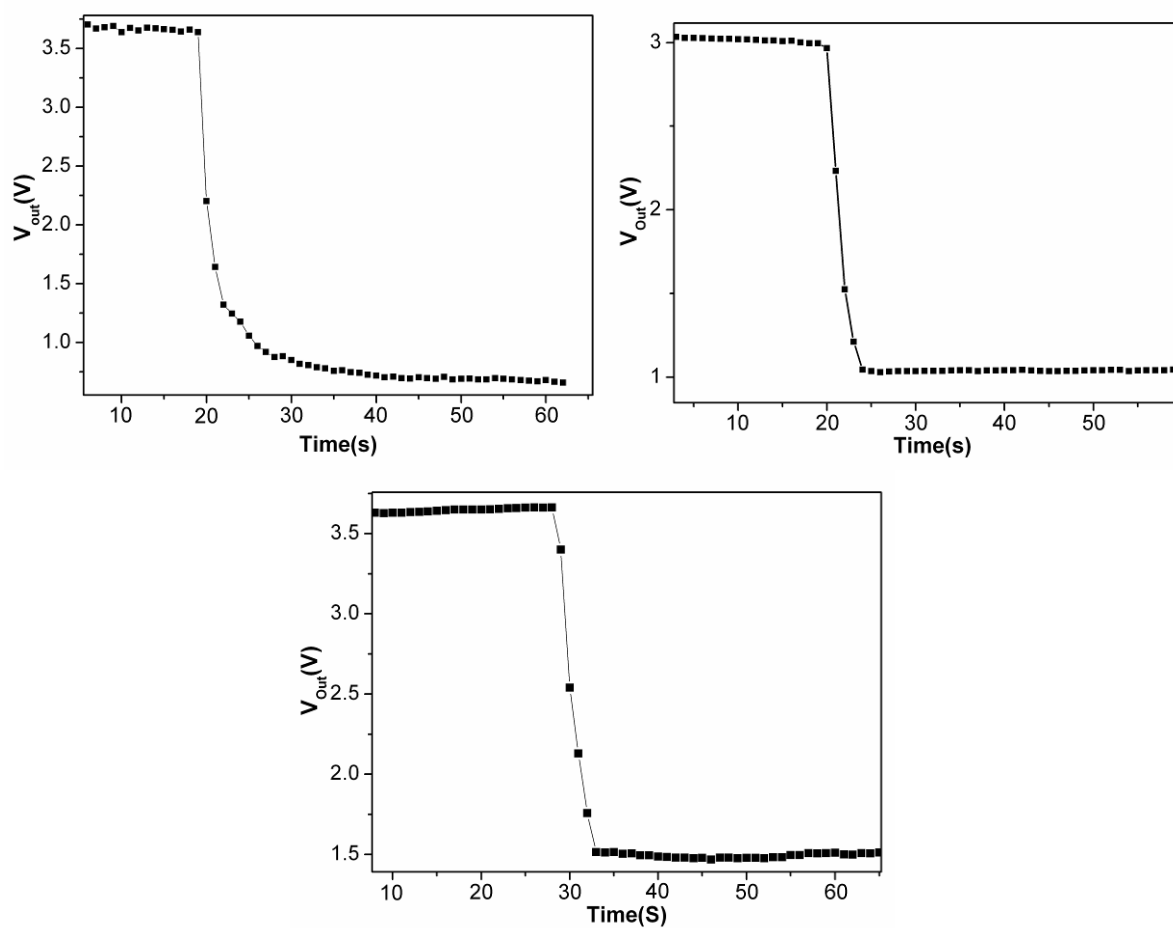

**Figure S3.** Sensing response of the sensors to 20 ppm (a) ethanol, (b) methanol, and (c) acetone. All the curves reveal very fast response time shorter than 10 s.

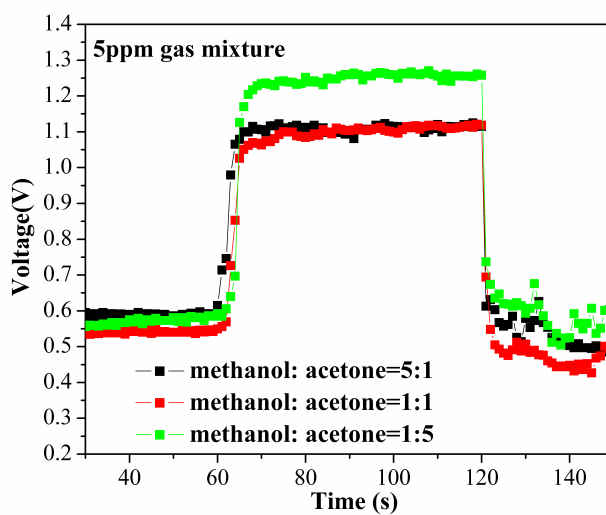

**Figure S4.** Sensing response of the sensors to the mixture of methanol and acetone with different volume ratios.
